# Supplementary material for: Mouse models of Casc3 reveal developmental functions distinct from other components of the exon junction complex
Source: PubMed Central journal article supplement — RNA. 2017 Jan;23(1):23–31. doi: 10.1261/rna.058826.116 (PMC5159646; doi:10.1261/rna.058826.116), 2017-01
Supplement: supp_058826.116_Supplemental_Fig_S1.pdf [file supp_058826.116_Supplemental_Fig_S1.pdf]

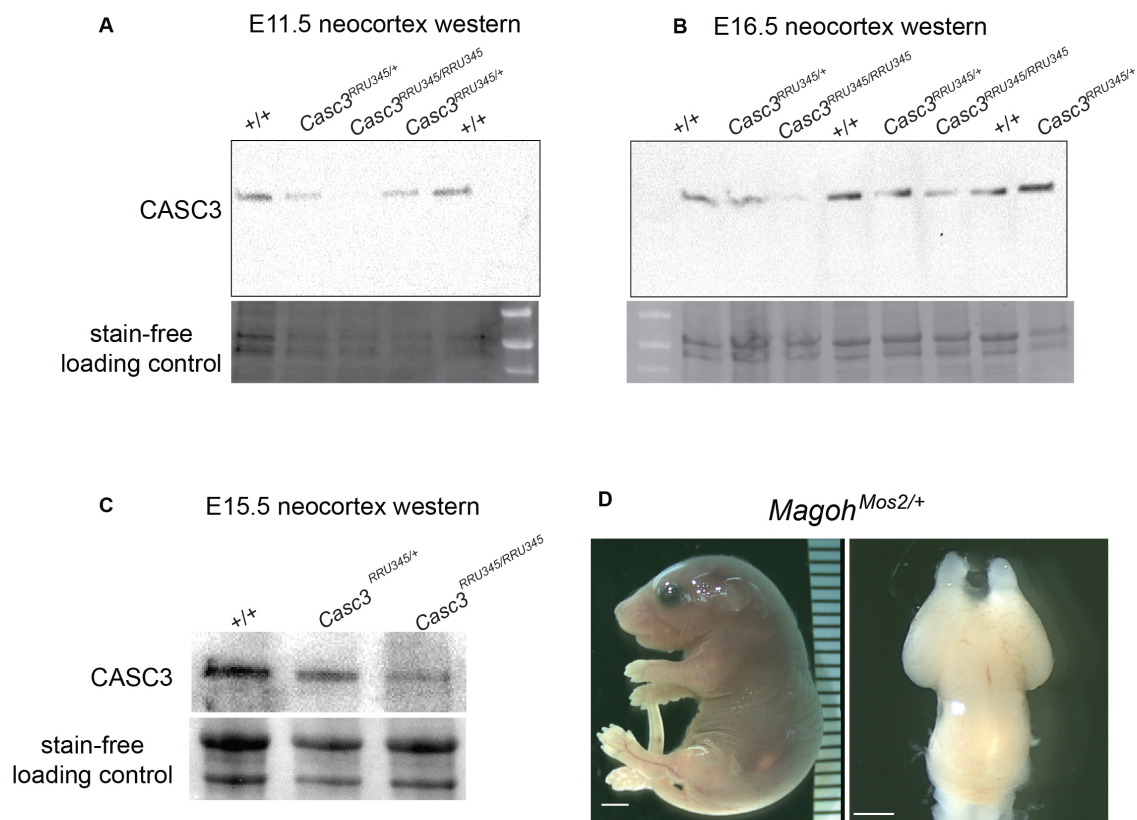

**Supplementary Figure 1: Analysis of CASC3 protein levels and Magoh phenotypes (A-C)**

Western analysis of CASC3 expression level in brain lysates of *Casc3*<sup>RRU345</sup> mutant and control embryos at indicated ages. Independent biological samples are loaded in each lane. Note CASC3 levels are consistently reduced in *Casc3*<sup>RRU345/RRU345</sup> brains comparing to the controls. (D) Representative image of E18.5 *Magoh*<sup>Mos2/+</sup> embryo and brain. Note a reduced forebrain size comparing to control (compare to Fig1. Q and S).
