# Supplementary material for: Mouse models of Casc3 reveal developmental functions distinct from other components of the exon junction complex
Source: PubMed Central journal article supplement — RNA. 2017 Jan;23(1):23–31. doi: 10.1261/rna.058826.116 (PMC5159646; doi:10.1261/rna.058826.116), 2017-01
Supplement: supp_058826.116_Supplemental_Fig_S2.pdf [file supp_058826.116_Supplemental_Fig_S2.pdf]

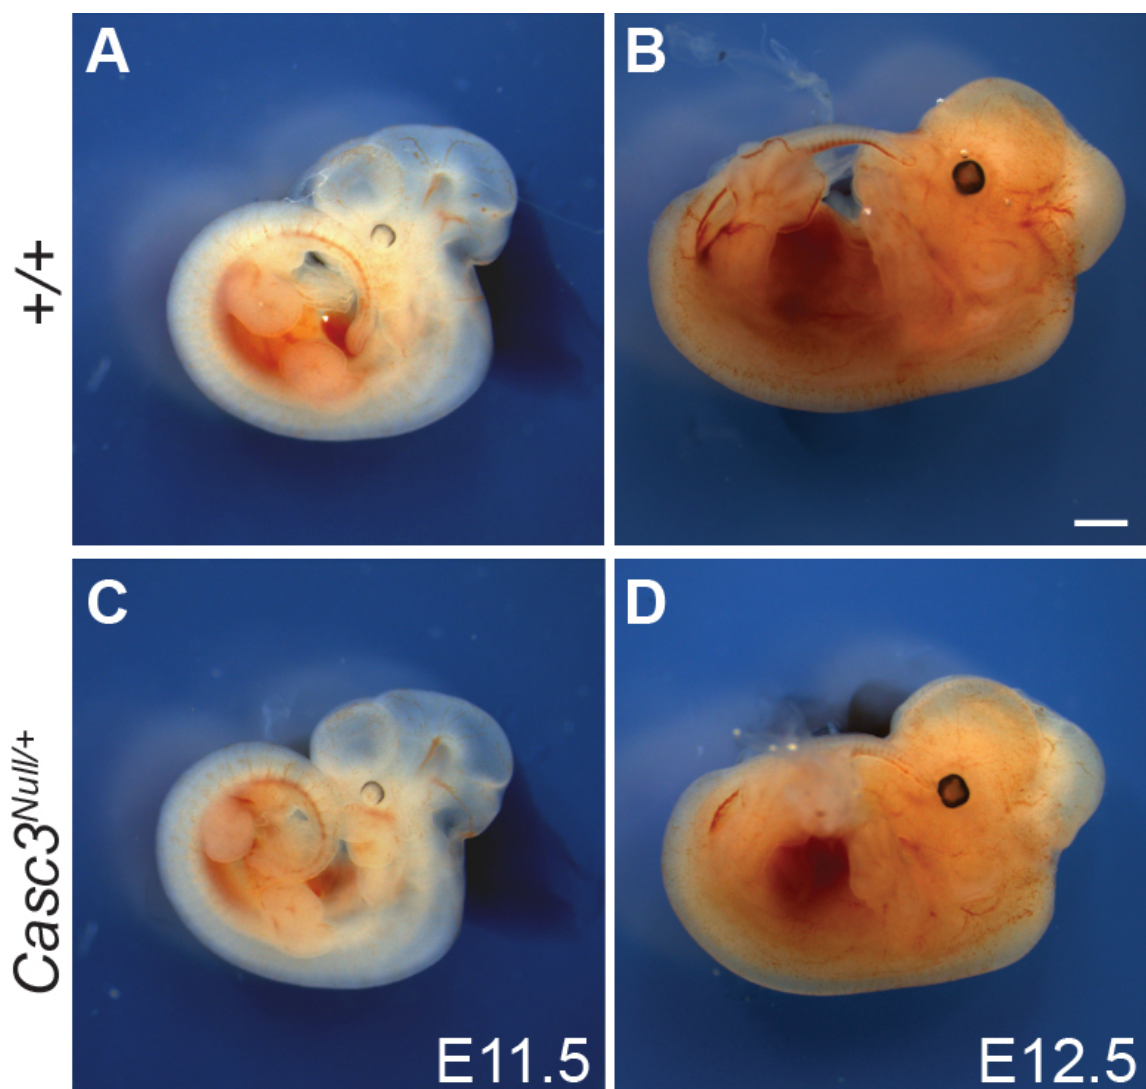

**Supplementary Figure 2: *Casc3*<sup>Null/+</sup> embryos were phenotypically normal.** (A, B) Representative images of wildtype embryos at E11.5 (A) and E12.5 (B). (C,D) Representative images of *Casc3*<sup>Null/+</sup> embryos at E11.5 (C) and E12.5 (D). Note there is no overt morphological difference between the wildtype and the *Casc3*<sup>Null/+</sup> embryos.
