# Supplementary material for: Mouse models of Casc3 reveal developmental functions distinct from other components of the exon junction complex
Source: PubMed Central journal article supplement — RNA. 2017 Jan;23(1):23–31. doi: 10.1261/rna.058826.116 (PMC5159646; doi:10.1261/rna.058826.116), 2017-01
Supplement: supp_058826.116_Supplemental_Fig_S3.pdf [file supp_058826.116_Supplemental_Fig_S3.pdf]

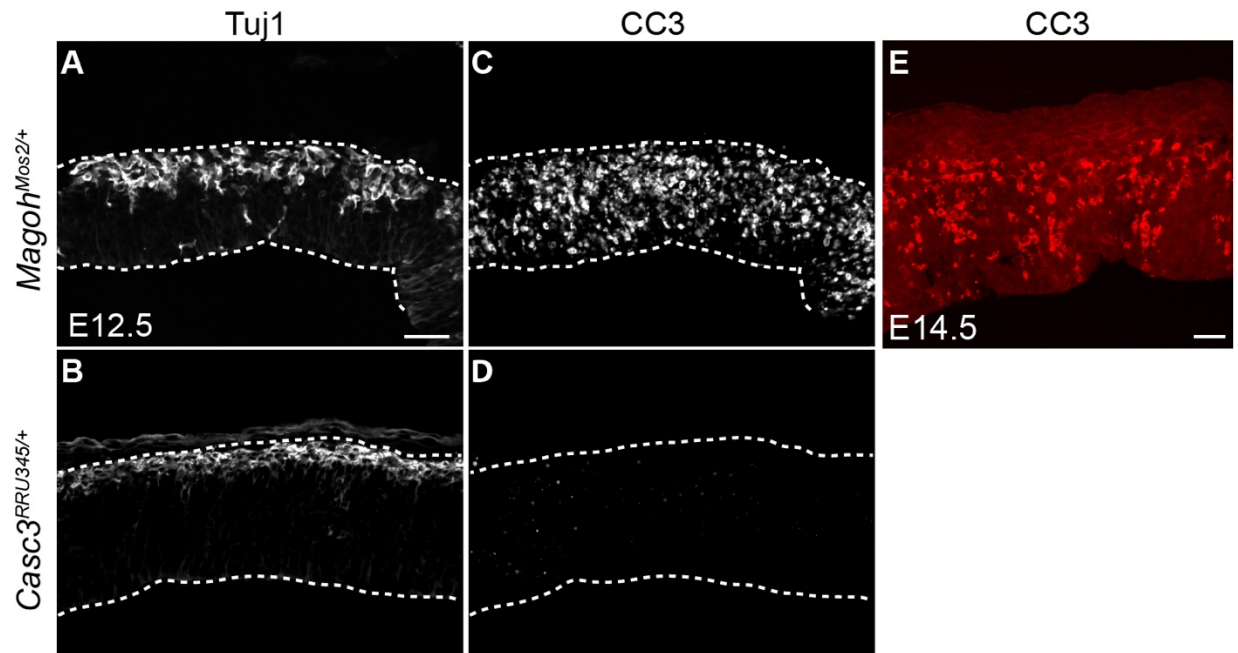

**Supplementary Figure 3: Immunofluorescence staining of *Casc3*<sup>RRU345/+</sup> and *Magoh*<sup>Mos2/+</sup> germline mutant brain sections shows phenotypic difference.** (A-B). *Casc3*<sup>RRU345/+</sup> brains showed no ectopic neuron production comparing to *Magoh*<sup>Mos2/+</sup> mutants. (C-E). Extensive apoptosis observed in *Magoh*<sup>Mos2/+</sup> mutants was not observed in *Casc3*<sup>RRU345/+</sup> brains. Scale bar, A-D, 50  $\mu$ m, E, 20  $\mu$ m.
